# Supplementary material for: Achieving electrochemical capacitor functionality from nanoscale LiMn2O4 coatings on 3-D carbon nanoarchitectures
Source: Royal Society of Chemistry journal article supplement (doi:10.1039/c2ta00937d), 2012-12-14
Supplement: c2ta00937d.pdf [file c2ta00937d.pdf]

Cite this: DOI: 10.1039/c0xx00000x

www.rsc.org/xxxxxx

## Achieving electrochemical capacitor functionality from a traditional battery material: conformal, nanoscale $\text{LiMn}_2\text{O}_4$ coatings on 3-D, device-ready carbon nanoarchitectures

Megan B. Sassin,<sup>\*a</sup> Steve G. Greenbaum,<sup>b</sup> Phillip E. Stallworth,<sup>b</sup> Azzam N. Mansour,<sup>c</sup> Benjamin P. Hahn,<sup>d</sup> Katherine A. Pettigrew,<sup>d</sup> and Debra R. Rolison,<sup>a</sup> Jeffrey W. Long,<sup>\*a</sup>

Received (in XXX, XXX) Xth XXXXXXXXXX 20XX, Accepted Xth XXXXXXXXXX 20XX

DOI: 10.1039/b000000x

### XAS experimental details

10 The K-edge absorption was isolated by fitting the pre-edge region (6239–6439 eV) with a quadratic polynomial, extrapolating over the entire range of the spectrum, and subtracting the pre-edge background from the entire spectrum. Step normalization was applied using the atomic absorption,  
15 which was determined by fitting the post edge region (6639–8040 eV) with a cubic polynomial. The photoelectron wave number was derived by setting the inner potential to the inflection point energy. The extended X-ray absorption fine structure (EXAFS) data,  $\chi(k)$ , were extracted using multi-node  
20 cubic spline procedures applied to  $k^3$ -weighted spectra over the  $k$ -range of 2.0–15.0  $\text{\AA}^{-1}$ . The post-edge background was optimized by minimizing the amplitude of non-physical peaks in the 0–0.9  $\text{\AA}$  region of the Fourier transform. The data analysis  
25 up to this point was carried out using the WinXAS software package (version 3.1).<sup>1,2</sup> The Fourier transforms presented here were generated with  $k^3$ -weighted EXAFS spectra over the range 3.0–15  $\text{\AA}^{-1}$  and a Hanning window of 1.0  $\text{\AA}^{-1}$  using the curve fitting code FEFFIT (version 2.984) of the University of  
Washington XAFS (UWXAFS) software package.<sup>3</sup>

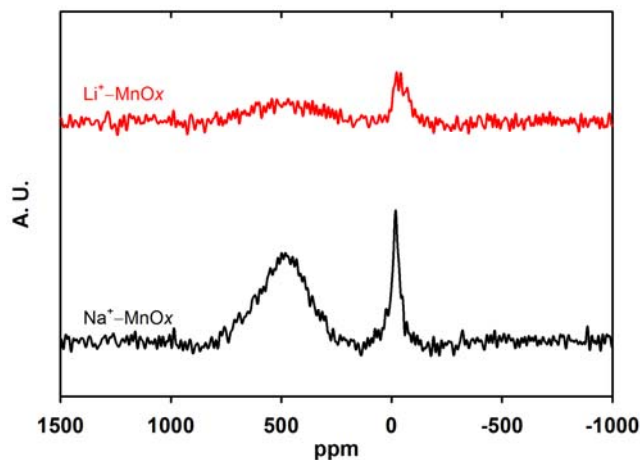

30 **Fig. S1.** Solid-state  $^{23}\text{Na}$  nuclear magnetic resonance spectra of  $\text{Na}^+\text{-MnO}_x$  (—) and  $\text{Li}^+\text{-MnO}_x$  (—).

35

45

40

50

55

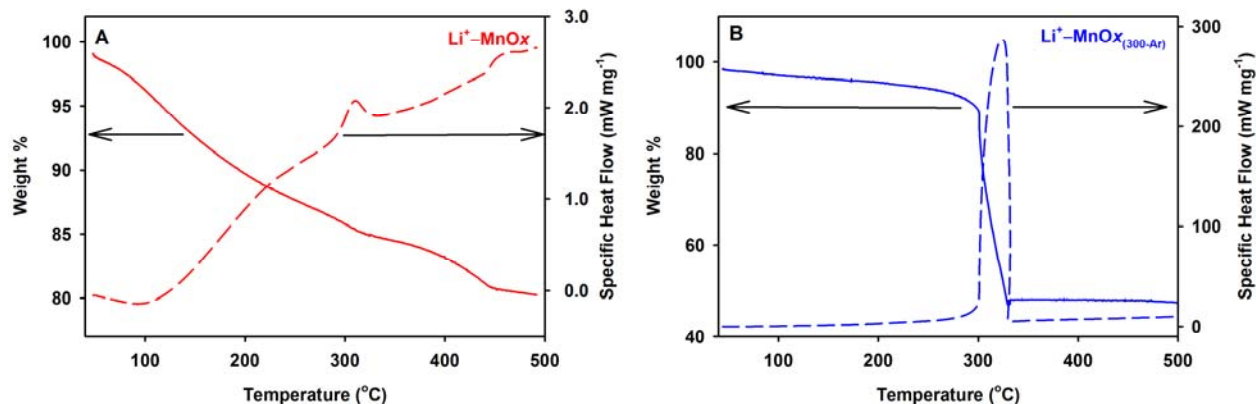

**Fig. S2.** Thermal gravimetric analysis (—) and differential scanning calorimetry (---) of (A)  $\text{Li}^+\text{-MnO}_x$  in an argon atmosphere and (B)  $\text{Li}^+\text{-MnO}_x(300\text{-Ar})$  in an oxygen atmosphere.

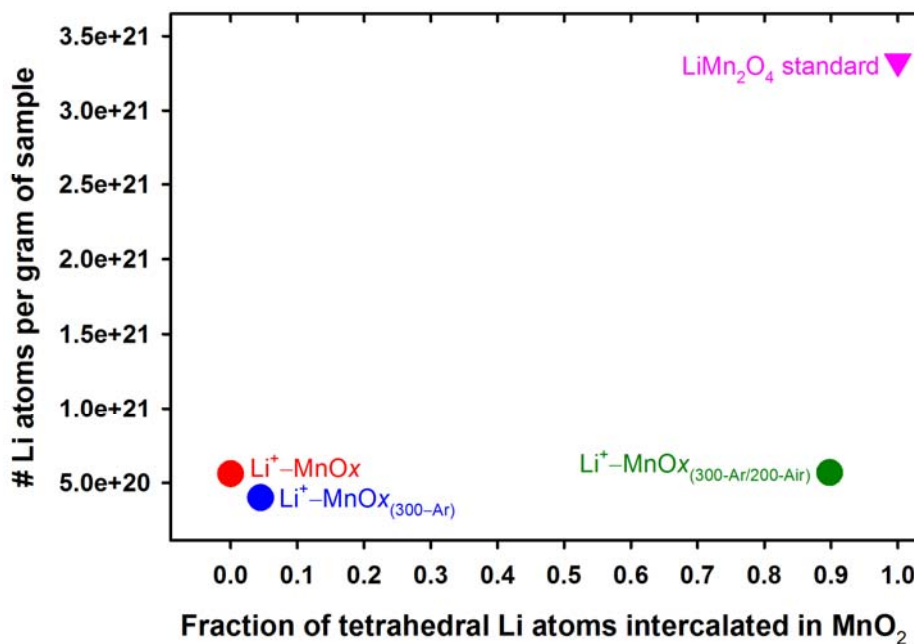

**Fig. S3.** Plot of # of Li atoms per gram of sample versus fraction of Li atoms in tetrahedral site derived from solid-state  $^7\text{Li}$  NMR for  $\text{LiMn}_2\text{O}_4$  standard ( $\blacktriangledown$ ),  $\text{Li}^+\text{-MnO}_x$  ( $\bullet$ ),  $\text{Li}^+\text{-MnO}_x(300\text{-Ar})$  ( $\bullet$ ), and  $\text{Li}^+\text{-MnO}_x(300\text{-Ar}/200\text{-Air})$  ( $\bullet$ ).

35

25

30

40

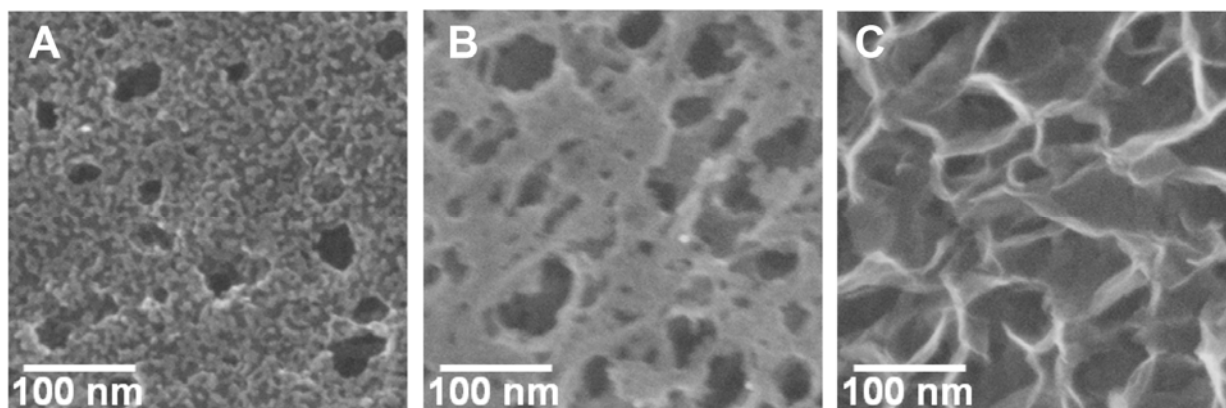

**Fig. S4.** Scanning electron micrographs of the exterior surface of (A)  $\text{Li}^+\text{-MnO}_x(300\text{-Ar}/200\text{-Air})$ , (B)  $\text{Li}^+\text{-MnO}_x(300\text{-Ar}/200\text{-Air})$  after 200 voltammetric cycles in 2.5 M  $\text{Li}_2\text{SO}_4$ , and (C)  $\text{Li}^+\text{-MnO}_x(300\text{-Ar}/200\text{-Air})$  after 200 cycles in 2.5 M  $\text{Li}_2\text{SO}_4 + 20$  mM  $\text{NaHCO}_3$ .

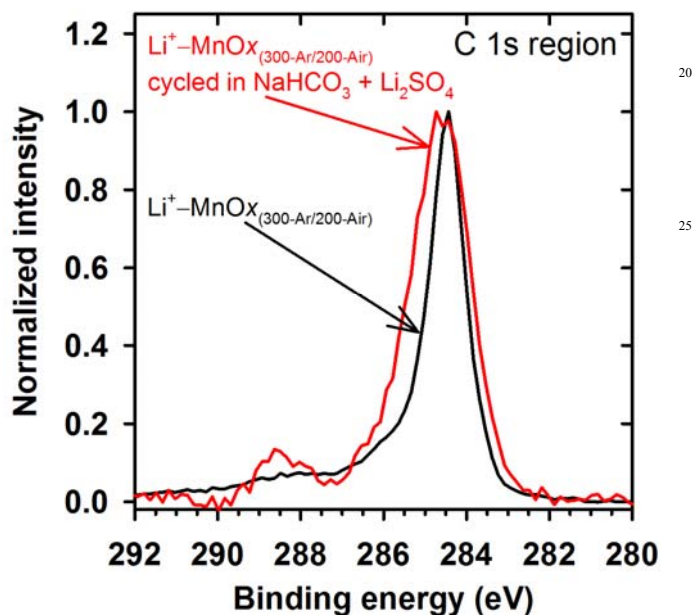

**Fig. S5.** X-ray photoelectron C 1s spectra of  $\text{Li}^+\text{-MnO}_x(300\text{-Ar}/200\text{-Air})$  (—) and  $\text{Li}^+\text{-MnO}_x(300\text{-Ar}/200\text{-Air})$  after 200 voltammetric cycles in 2.5 M  $\text{Li}_2\text{SO}_4 + 20$  mM  $\text{NaHCO}_3$  (—).

## Notes and references

<sup>a</sup>U. S. Naval Research Laboratory, Surface Chemistry Branch (Code 6170), Washington, DC 20375, USA.

\*Corresponding Authors: Fax: 202-767-3321;

E-mail: megan.sassin@nrl.navy.mil, jeffrey.long@nrl.navy.mil,

rolison@nrl.navy.mil

<sup>b</sup>Hunter College of CUNY, 695 Park Avenue, New York, NY 10065

E-mail: steve.greenbaum@hunter.cuny.edu

<sup>c</sup>Naval Surface Warfare Center, Carderock Division, 9500 MacArthur Blvd., West Bethesda, MD 20817-5700

E-mail: azzam.mansour@navy.mil

<sup>d</sup>Nova Research Inc., 1900 Elkin Street, Suite 230,

Alexandria, Virginia 22308

E-mail: kapettigrew@gmail.com, hahnbp@gmail.com

S1. T. Ressler, *J. Synchrotron Radiat.*, 2000, **5**, 118.

S2. T. Ressler, *J. Phys. IV*, 1997, **7**, C2-269.

S3. E.A. Stern, M. Newville, B. Ravel, Y. Yacoby, and D. Haskel, *Physica B*, 1995, **208-209**, 117.
